# Supplementary material
Source: Springer Nature journal article supplement (https://www.springermedizin.de/resource/supplementary/12889_2012_4394_MOESM3_ESM.docx/9492404)
Supplement: MOESM3 [file 9492404]

All men aged 40 years and living in the north-east of Helsinki were invited n=715

No response n=481

Risk assessment of Participant at Health Centre by nurses n=234

missing data n=38

Complete data; analyses performed n=196

FINDRISC ≥ 7 n = 82

CVD score ≥ 4.5 n= 67

CVD score ≥ 4.5 and FINDRISC ≥ 7 n = 40
